# Supplementary material for: A cross-linkable, organic down-converting material for white light emission from hybrid LEDs
Source: Royal Society of Chemistry journal article supplement (doi:10.1039/d2tc05139g), 2023-01-01
Supplement: d2tc05139g1.pdf [file d2tc05139g1.pdf]

## Supplementary Information

### A cross-linkable, organic down-converting material for white light emission from hybrid LEDs

Hao Yang,<sup>a</sup> Jochen Bruckbauer,<sup>b</sup> Lyudmyla Kanibolotska,<sup>a</sup> Alexander L. Kanibolotsky,<sup>a,c</sup> Joseph Cameron,<sup>a</sup> David J. Wallis,<sup>d,e</sup> Robert W. Martin\*<sup>b</sup> and Peter J. Skabara\*<sup>a</sup>

<sup>a</sup>WestCHEM, School of Chemistry, University of Glasgow, Glasgow, G12 8QQ, UK.

E-mail: peter.skabara@glasgow.ac.uk

<sup>b</sup>Department of Physics, SUPA, University of Strathclyde, Glasgow, G4 0NG, UK.

E-mail: r.w.martin@strath.ac.uk

<sup>c</sup>Institute of Physical-Organic Chemistry and Coal Chemistry, 02160 Kyiv, Ukraine

<sup>d</sup>Department of Materials and Metallurgy, University of Cambridge, Cambridge, CB3 0FS, UK

<sup>e</sup>Centre for High Frequency Engineering, University of Cardiff, Cardiff, CF24 3AA, UK

### Contents

|                                         |
|-----------------------------------------|
| <b>1. Materials and instrumentation</b> |
| <b>2. Device fabrication</b>            |
| <b>3. NMR spectra</b>                   |
| <b>4. Thermal analysis</b>              |
| <b>5. GPC analysis of p(GC)</b>         |

## 1. Materials and instrumentation

All reagents were purchased from Sigma Aldrich, Alfa Aesar, and Fluorochem. They were used without further purification.

All cinnamate-based materials were cross-linked under Vilber Lourmat handheld UV lamp that consists of two tubes that emit at 254 nm wavelength at 16 W of power. <sup>1</sup>H and <sup>13</sup>C NMR spectra of samples were dissolved in deuterated chloroform and were both obtained from a Bruker AVIII 400 spectrometer at 400 MHz and 100 MHz, respectively. Mass spectra data were collected from Matrix-Assisted Laser Desorption/Ionization-Time of Flight (MALDI-TOF) spectrometry with the instrumentation model of a Shimadzu Axima Performance spectrometer (mass range 1-500 000 Da in linear mode and 1-80 000 Da in reflectron mode). The spectra were taken in reflectron mode using dithranol and retinoic acid as matrices. Elemental analysis measurements were done with an Exeter CE-440 Elemental Analyser. TGA measurement was conducted on a Netzsch TG 209 F3 Tarsus thermogravimetric analyser. All melting points were measured with a Stuart Scientific Melting point apparatus. UV-vis absorption spectra were collected from a Shimadzu UV 2700 Spectrophotometer. For absorption spectroscopy, dilute solutions in dichloromethane ( $10^{-6}$  M) were prepared and were placed in a quartz cuvette with 1 cm path length. The scan range was set at 250-900 nm while the scan speed was set to normal. UV-vis absorption spectra of solid-state samples were measured by scanning GreenCin and GreenCin-TCM films that were spin-coated on quartz slides from toluene solutions at 2000 rpm speed. The instrumentation settings were kept the same as the measurements of solution-state samples. Emission spectra and PLQY values of GreenCin and GreenCin-TCM composite materials were obtained from an Edinburgh Instruments Spectrofluorometer FS5. For solution-state measurements, the concentrations were set to  $10^{-6}$  M. The excitation wavelength for both emission spectra and PLQY measurements was set at 421 nm. The LEDs were characterised using a calibrated integrating sphere system (Labsphere illumina<sup>®</sup>plus 600/610) before and after deposition of the organic converter material. A Keithley 236 source measure unit was used as a constant current supply. All LEDs were driven with a constant forward current of 25 mA. Different parameters such as radiant and luminous flux, chromaticity coordinates (x, y), luminous and blue-to-white efficacy values were calculated from the recorded spectra, which are corrected for the system response. Parameters of hybrid devices were derived following standard methods described in Ref. 1 and 2.<sup>1,2</sup>

Gel Permeation Chromatography was carried out using a chromatograph which consisted of the GPCmax VE-2001 solvent and sample delivery module as well as Viscotek 305 TDA temperature controlled analyser with an integrated refractive index (RI), dual low angle light scattering (LALS, 7°) and right angle scattering (RALS, 90°) detectors. The red laser source ( $\lambda = 670$  nm) was used for light scattering measurements. The samples were run in THF with the flow rate of 1.0 ml/min at the temperature of 35 °C. The molecular weight determination was done assuming 100 % recovery. The calibration of the detectors was performed using a polystyrene (PS) standard with a low polydispersity index (PDI) (Mw=103 kDa, PDI=1.02). The results of calibration were checked by another PS standard with a higher molecular weight and PDI (Mw=245 kDa, PDI=2.28). The results of GPC analysis are shown on Figure S2.

## 2. Device fabrication

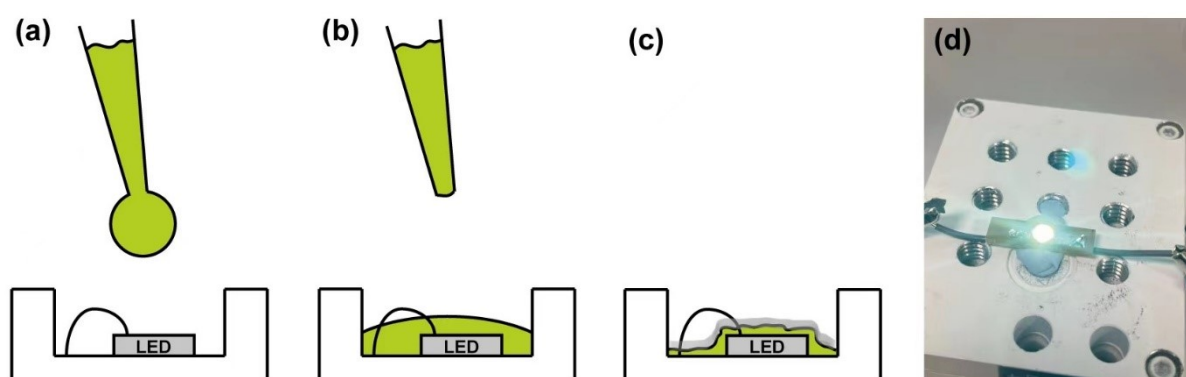

Fig. S1: Simplified schematic of the deposition process: (a) bare blue LED before drop-casting the organic colour converter using a pipette; (b) LED after deposition of several droplets of material inside the LED package on top of the LED die, (c) LED after organic down-converting material was cross-linked and washed followed by a second layer of cross-linked TCM film was applied to protect the emissive materials; (d) photo of a hybrid LED under operation inside the integrating sphere.

### 3. NMR spectra

#### 4,7-bis(7-(4-oxymethylphenyl)-9,9-dihexylfluoren-2-yl)-2,1,3-benzothiadiazole

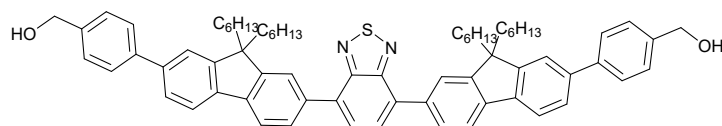

#### $^1\text{H}$ NMR (CDCl<sub>3</sub>, 400 MHz)

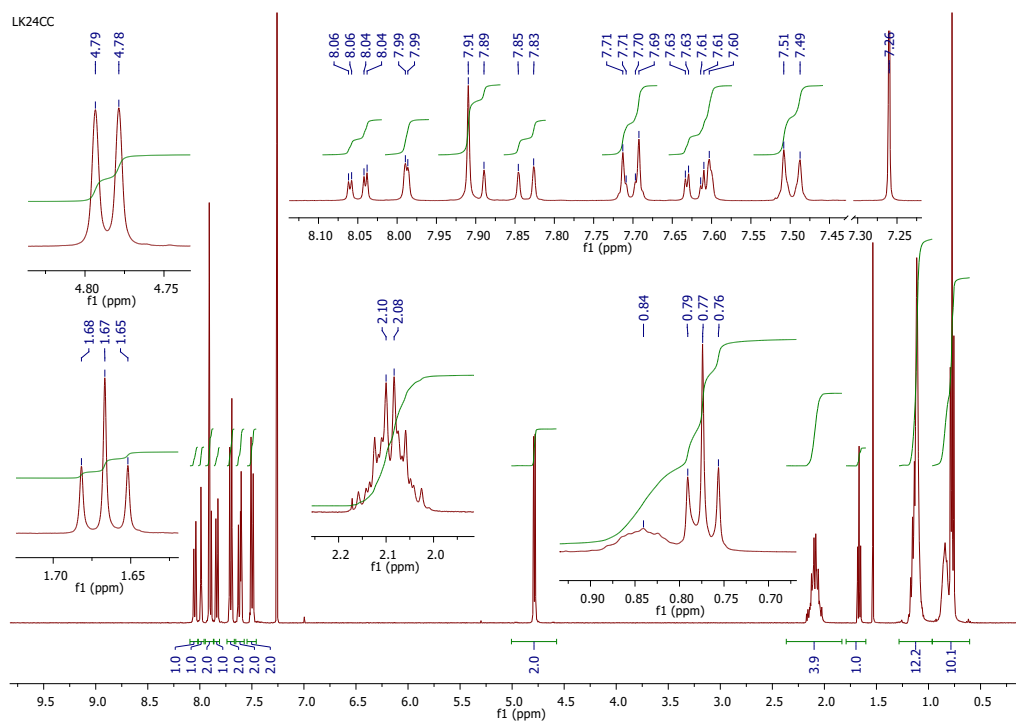

#### $^{13}\text{C}$ NMR (CDCl<sub>3</sub>, 100 MHz)

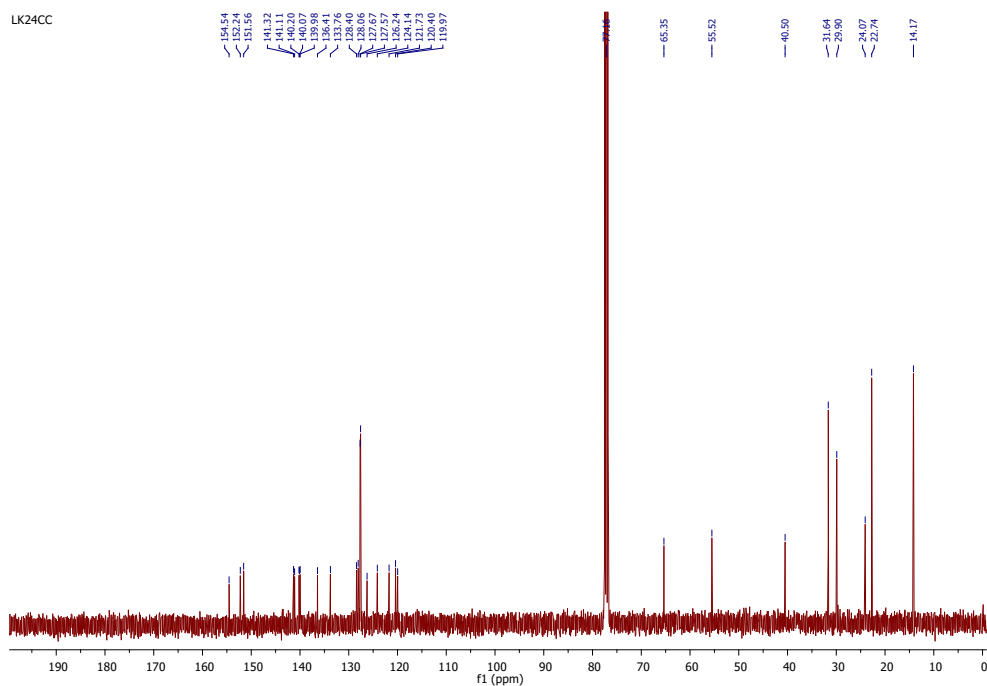

**4,7-bis(7-(4-cinnamoyloxymethylphenyl)-9,9-dihexylfluoren-2-yl)-2,1,3-benzothiadiazole  
(GreenCin)**

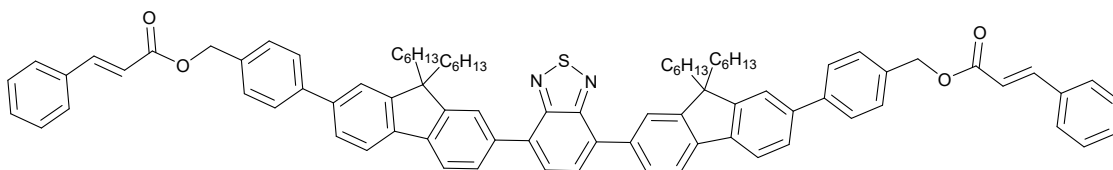

**<sup>1</sup>H NMR (CDCl<sub>3</sub>, 400 MHz)**

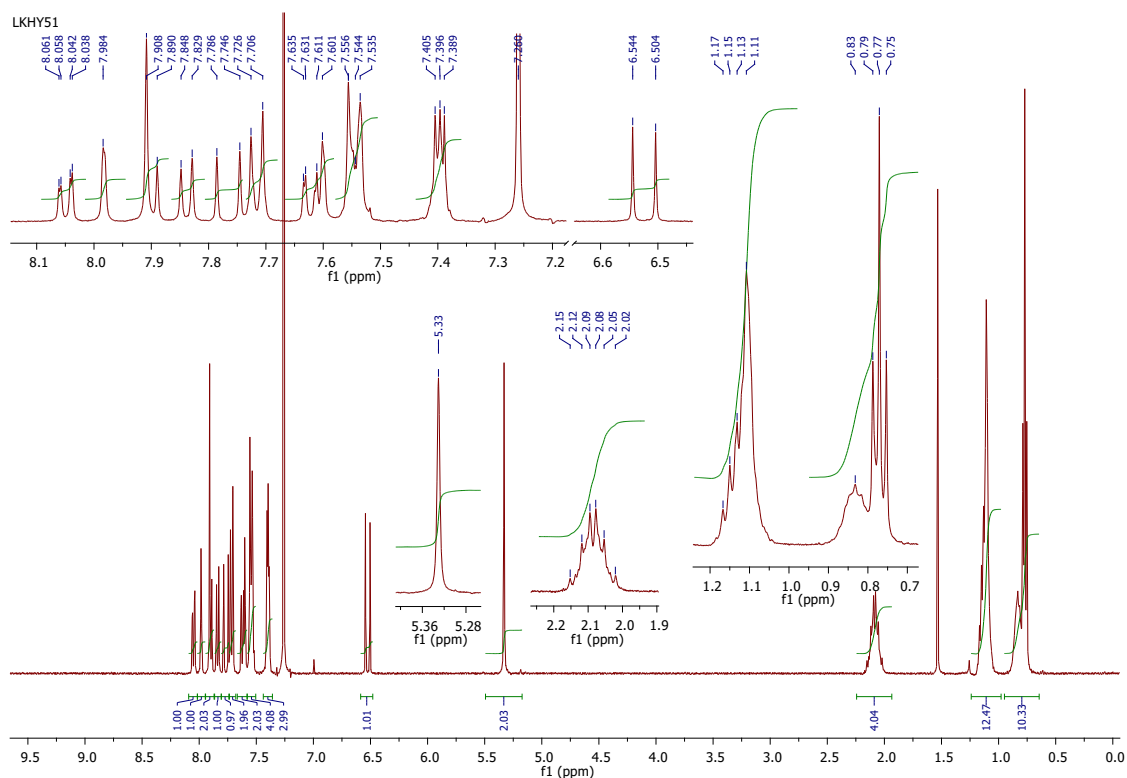

**<sup>13</sup>C NMR (CDCl<sub>3</sub>, 100 MHz)**

LKHYS1

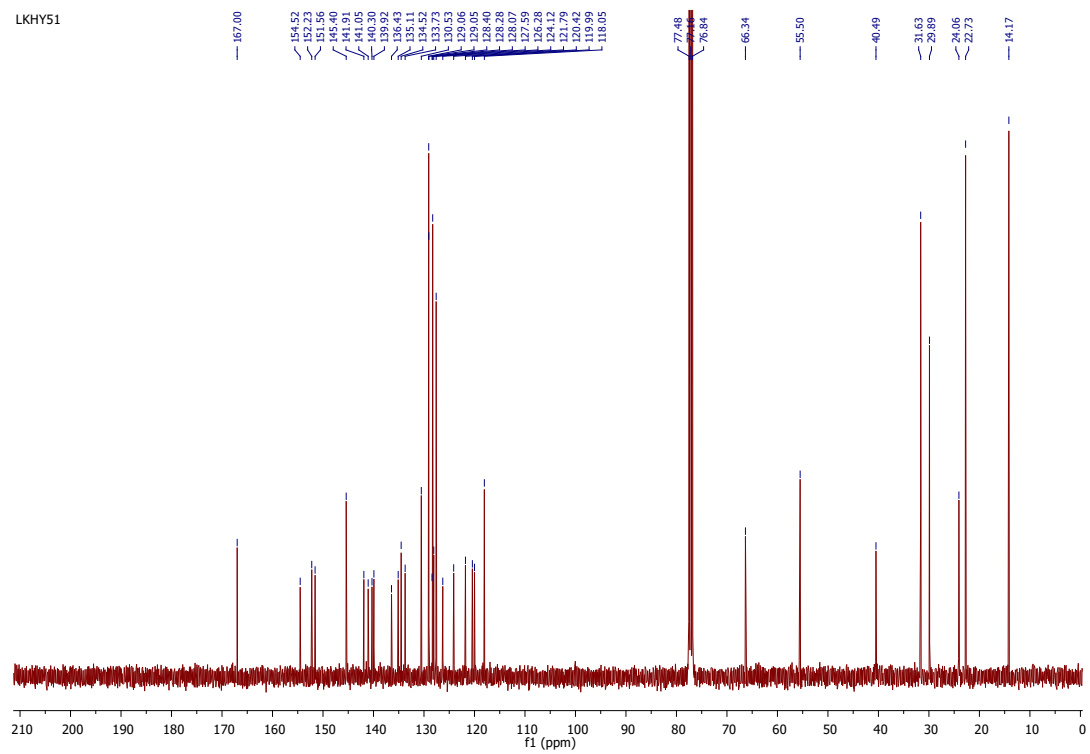

#### 4. Thermal analysis

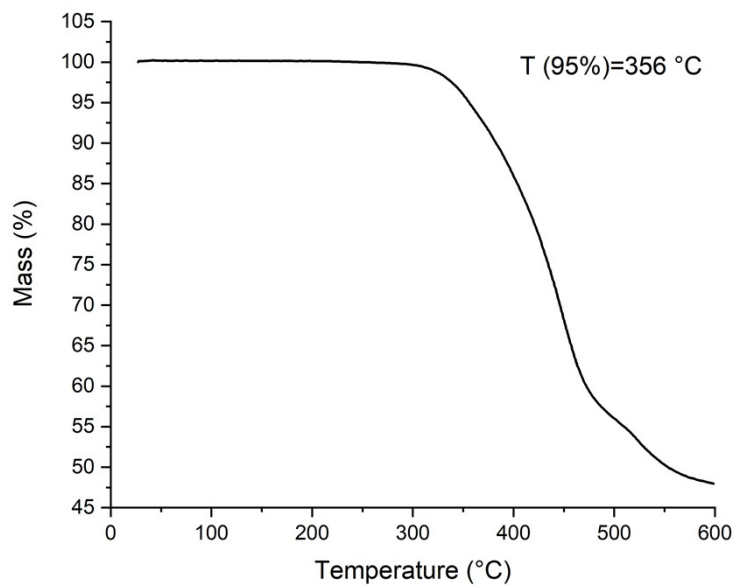

Fig. S2: Thermogravimetric analysis (TGA) of **GreenCin**

#### 5. GPC analysis of p(GC).

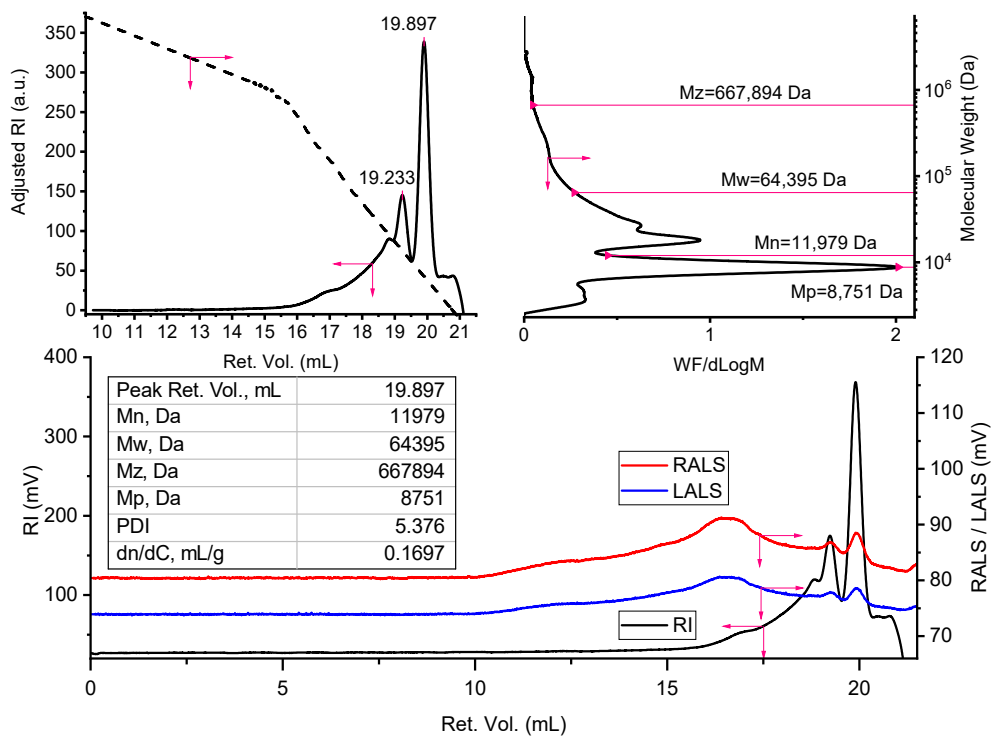

Fig. S3: GPC analysis of **p(GC)**

**References:**

1. J. Bruckbauer and N. J. Findlay, in *Optoelectronic Organic-Inorganic Semiconductor Heterojunctions*, ed. Y. Zhou, CRC Press, Boca Raton, 1st edn., 2021, ch. 10, pp. 231-266.
2. E. F. Schubert, *Light-Emitting Diodes*, Cambridge University Press, Cambridge, 2nd edn., 2006, ch. 16-19, pp. 275-331.
